# Supplementary material for: Polychaete Diversity and Functional Trait Composition in Subtropical Mangrove Ecosystems
Source: MDPI journal article supplement (doi:10.3390/d15090998), 2023-09-07
Supplement: s1 [file s1]

## Supplementary materials

**Table S1.** Taxonomic list and mean density (ind.m<sup>-2</sup>±SE) of polychaetes in the mangrove vegetated habitats and mudflats in the Persian Gulf and Gulf of Oman.

| Species                                                                           | Gwadar     |              | Sirik       |              | Nayband   |         |
|-----------------------------------------------------------------------------------|------------|--------------|-------------|--------------|-----------|---------|
|                                                                                   | Vegetated  | Mudflat      | Vegetated   | Mudflat      | Vegetated | Mudflat |
| <i>Perinereis horsti</i> (Gravier, 1899)                                          | 56±13      | -            | 37.81±6.7   | 16±0.0       | -         | -       |
| <i>Neanthes glandicincta</i> (Southern, 1921)                                     | 54.4±21.04 | 155.42±35.12 | 36.57±12.56 | 609.45±105.9 | 16±0.0    | -       |
| <i>Tylonereis bogoyawlenskyi</i> (Fauvel, 1911)                                   | 16±0.0     | 16±0.0       | -           | -            | -         | 16±0.0  |
| <i>Perinereis nuntia</i> (Lamarck, 1818)                                          | 16±0.0     | -            | -           | -            | -         | -       |
| <i>Namalycastis</i> sp. (Hartman, 1959)                                           | 16±0.0     | -            | -           | -            | -         | -       |
| <i>Aricidea fragilis</i> (Webster, 1879)                                          | -          | 154±35       | -           | -            | -         | -       |
| <i>Levinsenia gracilis</i> (Tauber, 1879)                                         | 16±0.0     | -            | -           | -            | -         | -       |
| <i>Melinna monoceroides</i> (Fauvel, 1936)                                        | -          | 16±0.0       | -           | -            | -         | -       |
| <i>Sigambra sundarbanensis</i> (Bhowmik, Ghoshal, Salazar-Vallejo & Mandal, 2021) | 16±0.0     | 48±19.32     | -           | -            | -         | -       |
| <i>Prionospio</i> sp. (Malmgren, 1867)                                            | -          | 16±0.0       | -           | -            | -         | -       |
| <i>Paleaequor</i> sp. (Watson Russell, 1986)                                      | -          | 48±14.53     | -           | -            | -         | -       |
| <i>Linopherus hirsuta</i> (Wesenberg-Lund, 1949)                                  | 16±0.0     | -            | -           | -            | -         | -       |
| <i>Lepidonotus purpureus</i> (Potts, 1910)                                        | 16±0.0     | 16±0.0       | -           | -            | -         | -       |
| <i>Questa riseri</i> (Giere & Erséus, 1998)                                       | 16±0.0     | -            | -           | -            | -         | -       |
| <i>Capitella aberranta</i> (Hartman & Fauchald, 1971)                             | -          | 16±0.0       | -           | -            | -         | -       |
| <i>Mediomastus warrenae</i> (Green, 2002)                                         | 16±0.0     | -            | -           | -            | -         | -       |
| <i>Heteromastus</i> sp.1 (Eisig, 1887)                                            | 34±9.45    | 57.6±16.42   | 16±0.0      | 16±0.0       | -         | -       |
| <i>Heteromastus</i> sp.2 (Eisig, 1887)                                            | 46±16.76   | 32.85±4.8    | -           | 26.66±6.73   | -         | -       |
| <i>Heteromastus</i> sp.3 (Eisig, 1887)                                            | 22±7.8     | 19.2±6.8     | -           | 16±0.0       | -         | -       |

|                                                 |          |        |        |        |          |   |
|-------------------------------------------------|----------|--------|--------|--------|----------|---|
| <i>Heteromastus</i> sp.4 (Eisig, 1887)          | 17.6±1.4 | 16±0.0 | -      | 16±0.0 | -        | - |
| <i>Leonnates indicus</i> (Kinberg, 1865)        | 16±0.0   | -      | -      | -      | -        | - |
| <i>Scolecopsis squamata</i> (Müller, 1806)      | -        | 16±0.0 | -      | -      | -        | - |
| <i>Scolecopsis</i> sp. (Blainville, 1828)       | -        | 16±0.0 | -      | -      | -        | - |
| <i>Glycinde</i> sp. (Müller, 1858)              | 16±0.0   | -      | -      | -      | -        | - |
| <i>Ctenodrilus</i> sp. (Claparède, 1863)        | 16±0.0   | -      | -      | -      | -        | - |
| <i>Marphysa sanguinea</i> (Monro, 1933)         | -        | 16±0.0 | -      | -      | -        | - |
| <i>Simplisetia erythraeensis</i> (Fauvel, 1918) | -        | -      | -      | 16±0.0 | 40±11.87 | - |
| <i>Marphysa</i> sp. (Quatrefages, 1866)         | -        | -      | 16±0.0 | -      | -        | - |
| <i>Phyllodoce</i> sp. (Lamarck, 1818)           | -        | -      | 16±0.0 | -      | -        | - |
| <i>Armandia</i> sp. (Filippi, 1861)             | -        | -      | -      | -      | 16±0.0   | - |
| <i>Syllis gracilis</i> (Grube, 1840)            | -        | -      | -      | -      | 32±6.93  | - |
| <i>Lepidonotus</i> sp. (Leach, 1816)            | -        | -      | -      | -      | 16±0.0   | - |
| <i>Armandia intermedia</i> (Fauvel, 1902)       | -        | -      | -      | -      | 16±0.0   | - |

---

**Table S2.** Result of SIMPER analysis determining the major species leading to the polychaete community structure difference between regions (GT: Gwadar, SK: Sirik and NY: Nyband), habitats (V: vegetated and M: mudflat) and seasons (W: winter and S: summer) in mangrove ecosystems in the Persian Gulf and Gulf of Oman ( $\geq 50\%$  cumulative frequency).

| <b>Groups GT &amp; SK</b>                      | <b>Average dissimilarity = 83.91</b>  |                              |                       |                  |                |
|------------------------------------------------|---------------------------------------|------------------------------|-----------------------|------------------|----------------|
| Species                                        | Average abundance (Group GT)          | Average abundance (Group SK) | Average dissimilarity | Contribution (%) | Cumulative (%) |
| <i>Neanthes glandicincta</i>                   | 3.01                                  | 8.73                         | 23.17                 | 27.61            | 27.61          |
| <i>Perinereis horsti</i>                       | 1.47                                  | 2.29                         | 14.76                 | 17.58            | 45.19          |
| <i>Heteromastus sp.1</i>                       | 2.06                                  | 0.8                          | 10.08                 | 12.02            | 57.21          |
| <b>Groups GT &amp; NY</b>                      | <b>Average dissimilarity = 99.39</b>  |                              |                       |                  |                |
| Species                                        | Average abundance (Group GT)          | Average abundance (Group NY) | Average dissimilarity | Contribution (%) | Cumulative (%) |
| <i>Simplisetia erythraeensis</i>               | 0                                     | 3                            | 15.06                 | 15.16            | 15.16          |
| <i>Heteromastus sp.1</i>                       | 2.06                                  | 0                            | 9.57                  | 9.63             | 24.79          |
| <i>Heteromastus sp.2</i>                       | 2.14                                  | 0                            | 8.98                  | 9.03             | 33.82          |
| <i>Neanthes glandicincta</i>                   | 3.01                                  | 0                            | 8.46                  | 8.51             | 42.33          |
| <i>Heteromastus sp.4</i>                       | 1.57                                  | 0                            | 8.27                  | 8.32             | 50.65          |
| <b>Groups SK &amp; NY</b>                      | <b>Average dissimilarity = 100.00</b> |                              |                       |                  |                |
| Species                                        | Average abundance (Group SK)          | Average abundance (Group NY) | Average dissimilarity | Contribution (%) | Cumulative (%) |
| <i>Neanthes glandicincta</i>                   | 8.73                                  | 0                            | 23.28                 | 23.28            | 23.28          |
| <i>Simplisetia erythraeensis</i>               | 0.13                                  | 3                            | 20.26                 | 20.26            | 43.54          |
| <i>Perinereis horsti</i>                       | 2.29                                  | 0                            | 19.92                 | 19.92            | 63.46          |
| <b>Groups V (vegetated) &amp; M (mudflats)</b> | <b>Average dissimilarity = 83.83</b>  |                              |                       |                  |                |
| Species                                        | Average abundance (Group V)           | Average abundance (Group M)  | Average dissimilarity | Contribution (%) | Cumulative (%) |
| <i>Neanthes glandicincta</i>                   | 1.69                                  | 10.48                        | 27.68                 | 33.02            | 33.02          |
| <i>Perinereis horsti</i>                       | 2.81                                  | 0.14                         | 11.32                 | 13.5             | 46.53          |
| <i>Heteromastus sp.1</i>                       | 1.22                                  | 1.72                         | 8.08                  | 9.64             | 56.17          |
| <b>Groups W (winter) &amp; S (summer)</b>      | <b>Average dissimilarity = 79.38</b>  |                              |                       |                  |                |
| Species                                        | Average abundance (Group W)           | Average abundance (Group S)  | Average dissimilarity | Contribution (%) | Cumulative (%) |
| <i>Neanthes glandicincta</i>                   | 3.74                                  | 7.86                         | 25.04                 | 31.55            | 31.55          |
| <i>Perinereis horsti</i>                       | 1.42                                  | 2.29                         | 13.14                 | 16.55            | 48.1           |
| <i>Heteromastus sp.1</i>                       | 1.01                                  | 2.16                         | 8.76                  | 11.03            | 59.14          |

**Table S3.** Result of SIMPER analysis determining the major traits leading to the polychaete community structure difference between regions (GT: Gwadar, SK: Sirik and NY: Nyband), habitats (V: vegetated and M: mudflat) and seasons (W: winter and S: summer) in mangrove ecosystems in the Persian Gulf and Gulf of Oman ( $\geq 50\%$  cumulative frequency).

| <b>Groups GT &amp; SK</b> | <b>Average dissimilarity = 41.30</b> |                              |                       |                  |                |
|---------------------------|--------------------------------------|------------------------------|-----------------------|------------------|----------------|
| Trait                     | Average abundance (Group GT)         | Average abundance (Group SK) | Average dissimilarity | Contribution (%) | Cumulative (%) |
| Ec.up                     | 0.55                                 | 0.14                         | 1.81                  | 4.39             | 4.39           |
| Fe.dsn                    | 0.55                                 | 0.14                         | 1.81                  | 4.39             | 8.78           |
| Ec.do                     | 0.51                                 | 0.14                         | 1.75                  | 4.23             | 13.01          |
| Mo.sih                    | 0.49                                 | 0.14                         | 1.73                  | 4.18             | 17.19          |
| Mo.seh                    | 0.49                                 | 0.14                         | 1.73                  | 4.18             | 21.37          |
| Fe.nsd                    | 0.49                                 | 0.14                         | 1.73                  | 4.18             | 25.55          |
| Fe.sd                     | 0.49                                 | 0.14                         | 1.73                  | 4.18             | 29.72          |
| Mo.no                     | 0.51                                 | 0.14                         | 1.7                   | 4.12             | 33.84          |
| AB.IV                     | 0.55                                 | 0.3                          | 1.7                   | 4.12             | 37.96          |
| Fe.sc                     | 0.29                                 | 0.42                         | 1.3                   | 3.16             | 52.53          |
| <b>Groups GT &amp; NY</b> | <b>Average dissimilarity = 52.95</b> |                              |                       |                  |                |
| Trait                     | Average abundance (Group GT)         | Average abundance (Group NY) | Average dissimilarity | Contribution (%) | Cumulative (%) |
| AMBI.IV                   | 0.55                                 | 0                            | 2.31                  | 4.35             | 8.86           |
| Si.100                    | 0.57                                 | 0.17                         | 2.22                  | 4.19             | 13.04          |
| Eco.up                    | 0.55                                 | 0                            | 2.06                  | 3.88             | 16.93          |
| Fe.dsn                    | 0.55                                 | 0                            | 2.06                  | 3.88             | 20.81          |
| Si.20                     | 0.29                                 | 0.52                         | 1.97                  | 3.73             | 24.54          |
| Eco.do                    | 0.51                                 | 0                            | 1.96                  | 3.71             | 28.24          |
| Mob.no                    | 0.51                                 | 0                            | 1.96                  | 3.71             | 31.95          |
| MoRe.sihe                 | 0.49                                 | 0                            | 1.93                  | 3.65             | 35.6           |
| MoRe.sehe                 | 0.49                                 | 0                            | 1.93                  | 3.65             | 39.24          |
| Fe.nsd                    | 0.49                                 | 0                            | 1.93                  | 3.65             | 46.89          |
| <b>Groups SK &amp; NY</b> | <b>Average dissimilarity = 36.79</b> |                              |                       |                  |                |
| Trait                     | Average abundance (Group SK)         | Average abundance (Group NY) | Average dissimilarity | Contribution (%) | Cumulative (%) |
| Lif.0                     | 0.02                                 | 0.52                         | 2.7                   | 7.34             | 7.34           |
| Si.20                     | 0.39                                 | 0.52                         | 2.28                  | 6.21             | 13.55          |
| Si.100                    | 0.39                                 | 0.17                         | 2.09                  | 5.67             | 19.21          |
| Fe.sd                     | 0.14                                 | 0.35                         | 1.78                  | 4.84             | 24.05          |
| Si.10                     | 0                                    | 0.35                         | 1.68                  | 4.58             | 28.63          |
| Si.80                     | 0.37                                 | 0.17                         | 1.6                   | 4.34             | 37.55          |
| Eco.ope-ven               | 0.28                                 | 0                            | 1.54                  | 4.19             | 46.08          |
| Fe.pre                    | 0.42                                 | 0.35                         | 1.5                   | 4.07             | 50.15          |
| <b>Groups V &amp; M</b>   | <b>Average dissimilarity = 33.44</b> |                              |                       |                  |                |
| Trait                     | Average abundance (Group V)          | Average abundance (Group M)  | Average dissimilarity | Contribution (%) | Cumulative (%) |
| Si.80                     | 0.24                                 | 0.5                          | 1.56                  | 4.66             | 4.66           |
| Fe.pre                    | 0.23                                 | 0.5                          | 1.46                  | 4.36             | 9.02           |
| AMBI.IV                   | 0.4                                  | 0.43                         | 1.35                  | 4.05             | 13.07          |
| Lif.3                     | 0.37                                 | 0.05                         | 1.33                  | 3.97             | 17.04          |
| Si.100                    | 0.52                                 | 0.41                         | 1.28                  | 3.82             | 20.86          |
| Fe.sca                    | 0.37                                 | 0.07                         | 1.26                  | 3.77             | 24.63          |
| Si.80                     | 0.5                                  | 0.38                         | 1.25                  | 3.74             | 28.37          |
| Eco.ope-ven               | 0.32                                 | 0.02                         | 1.19                  | 3.56             | 31.94          |
| Fe.pre                    | 0.53                                 | 0.45                         | 1.11                  | 3.31             | 38.74          |
| Mig.n                     | 0.32                                 | 0.33                         | 1.08                  | 3.23             | 41.97          |
| Fe.sd                     | 0.34                                 | 0.33                         | 1.07                  | 3.19             | 45.16          |

|                         |                                      |                             |                       |                  |                |
|-------------------------|--------------------------------------|-----------------------------|-----------------------|------------------|----------------|
| MoRe.sihe               | 0.31                                 | 0.33                        | 1.05                  | 3.15             | 51.47          |
| <b>Groups W &amp; S</b> | <b>Average dissimilarity = 32.71</b> |                             |                       |                  |                |
| Trait                   | Average abundance (Group W)          | Average abundance (Group S) | Average dissimilarity | Contribution (%) | Cumulative (%) |
| Si.20                   | 0.27                                 | 0.48                        | 1.43                  | 4.37             | 4.37           |
| Fe.sca                  | 0.27                                 | 0.45                        | 1.39                  | 4.26             | 8.63           |
| Fe.her                  | 0.24                                 | 0.27                        | 1.25                  | 3.83             | 12.46          |
| Si.80                   | 0.44                                 | 0.48                        | 1.19                  | 3.64             | 16.1           |
| Mob.no                  | 0.32                                 | 0.35                        | 1.18                  | 3.6              | 23.35          |
| Lif.3                   | 0.24                                 | 0.24                        | 1.18                  | 3.6              | 26.95          |
| Si.100                  | 0.47                                 | 0.48                        | 1.15                  | 3.52             | 34.01          |
| AMBL.IV                 | 0.42                                 | 0.4                         | 1.14                  | 3.49             | 37.51          |
| Eco.ope-ven             | 0.18                                 | 0.24                        | 1.13                  | 3.45             | 44.41          |
| Fe.sd                   | 0.32                                 | 0.37                        | 1.12                  | 3.42             | 47.83          |
| Fe.pre                  | 0.51                                 | 0.48                        | 1.12                  | 3.41             | 51.24          |
